# Supplementary material for: Paraptosis Cell Death Induction by the Thiamine Analog Benfotiamine in Leukemia Cells
Source: PubMed Central journal article supplement (PMC4388699; doi:10.1371/journal.pone.0120709), 2015-04-07
Supplement: pone.0120709.s001.pdf [file pone.0120709.s001.pdf]

**Table S1. Patient characteristics**

| Sample No | Gender | Age | AML stage (diagnosisWHO//FAB)                  | Cytogenetic                                                                                       |
|-----------|--------|-----|------------------------------------------------|---------------------------------------------------------------------------------------------------|
| AML-1     | M      | 66  | AML/MRC//M5a                                   | 46,X,-Y,+mar1 [17/20], 46, XY[3/20],                                                              |
| AML-2     | F      | 63  | AML:t(9;11)(p22;q23)//M5a                      | 47,XX,+8,t(9;11)(p22;q23) [7/20], 47, idem,t(4;5)(p16;q31)[2/20],52,idem,+2,+6,+19,+21,+22[11/20] |
| AML-3     | F      | 38  | AML NOS//M2 onset                              | 46,XX,-9,-16,+2mar [1/20], 46, XX[19/20],                                                         |
| AML-4     | M      | 53  | AML NOS//M1                                    | 46,XY [20/20]                                                                                     |
| AML5      | F      | 53  | AML NOS// M4 3rd relapse post UR BMT, post CBT | complex [7/20], 46, XX[13/20],                                                                    |
| AML-6     | M      | 39  | t-MN//AML (Post B-ALL)                         | 47,XY,dup(1)(q32q12),+8 [20/20]                                                                   |

AML/MRC: Acute Myeloid Leukemia with myelodysplasia-related changes

AML NOS: Acute myeloid leukemia, not otherwise specified

t-MN: Therapy-related myeloid Neoplasia
